# Supplementary material for: miR‐126‐3p is essential for CXCL12‐induced angiogenesis
Source: PubMed Central journal article supplement (PMC8256342; doi:10.1111/jcmm.16460), 2021-06-12
Supplement: JCMM-25-6032-s001.pdf [file JCMM-25-6032-s001.pdf]

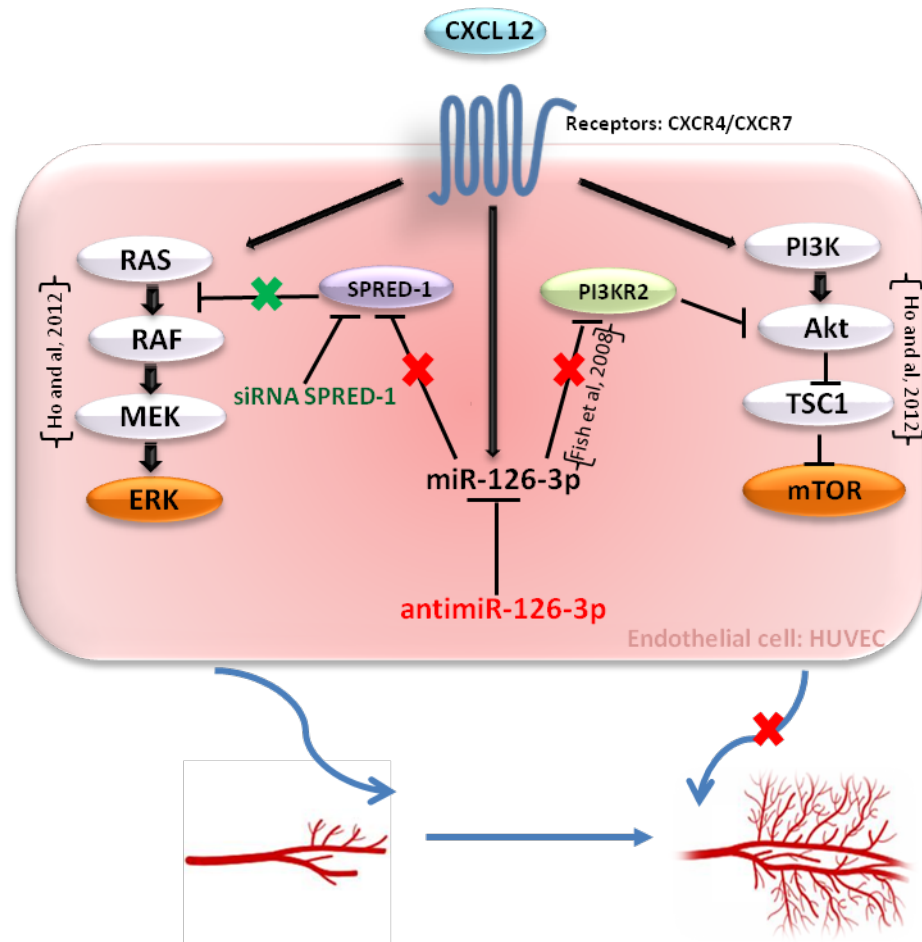

**Supplemental Figure 1. Two parallel pathways implicated in angiogenesis: CXCL12 has a proangiogenic effect via the activation of Erk and Akt signaling pathways. CXCL12 enhances miR-126-3p expression which inhibits SPRED-1 and PI3KR2, inducing the activation of Erk and Akt proangiogenic pathways.**

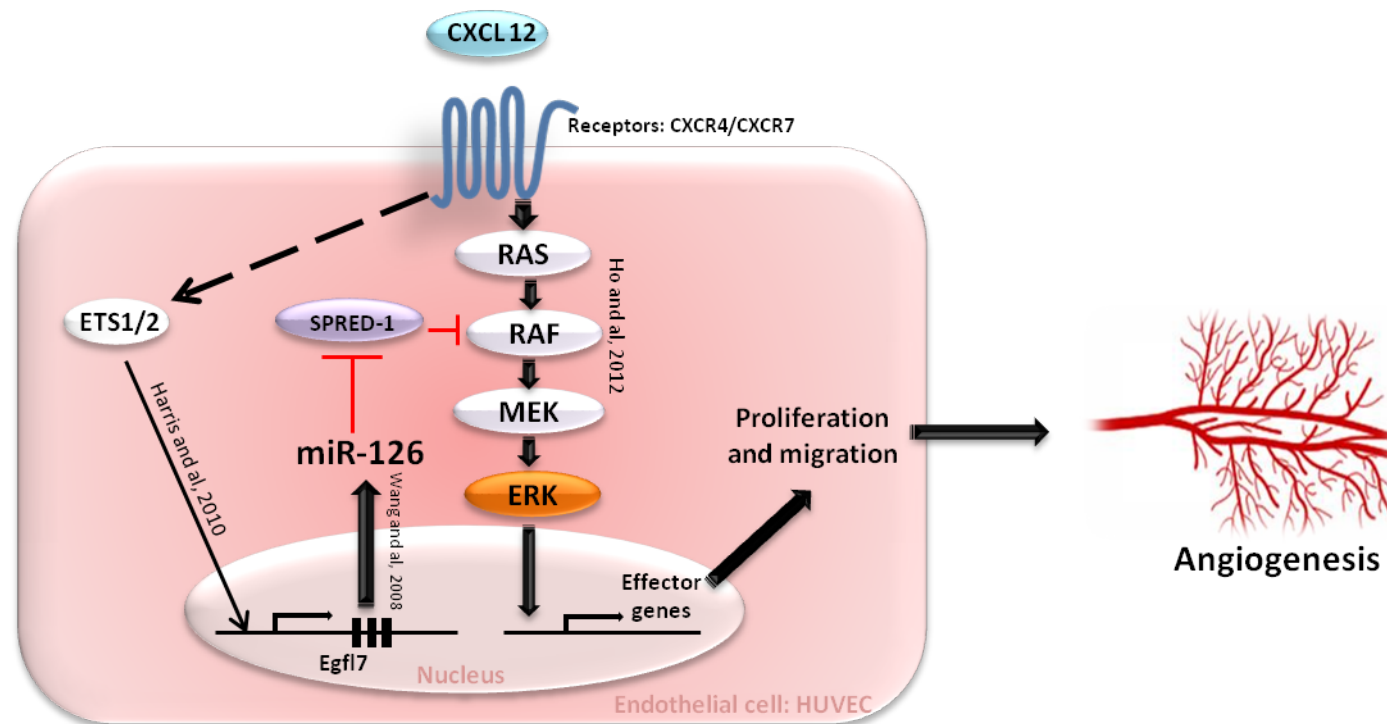

**Supplemental Figure 2. Hypothetical representation of CXCL12-induced angiogenesis via increase of miR-126 expression through the enhancing of egfl7 promotor activity.** CXCL12-based treatment increased the miR-126 level, which inhibits SPRED-1 expression leading to activation of MAPK pathways and the induction of EC proliferation, migration and angiogenesis.
